# Supplementary material
Source: Springer Nature journal article supplement (https://www.springermedizin.de/resource/supplementary/12874_2009_421_MOESM2_ESM.pdf/9432058)

(a)

 $\mu_\alpha$ 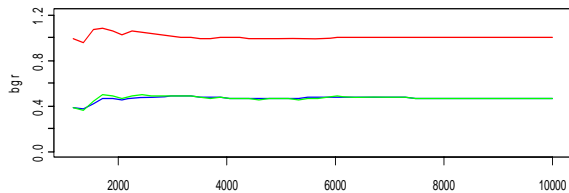 $\mu_\beta$ 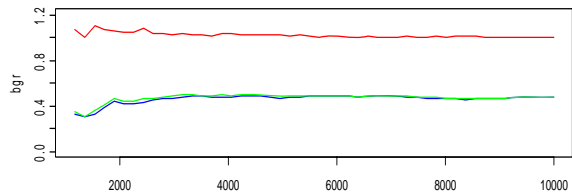

(b)

 $\mu_\alpha$ 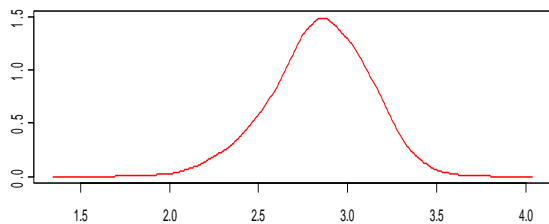 $\mu_\beta$ 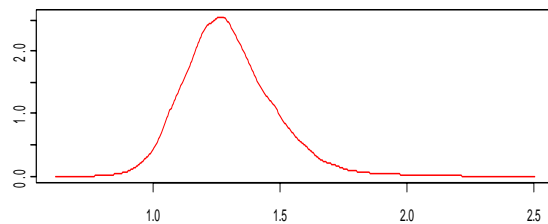 $E[\lambda_i]$  $E[\mu_i]$ 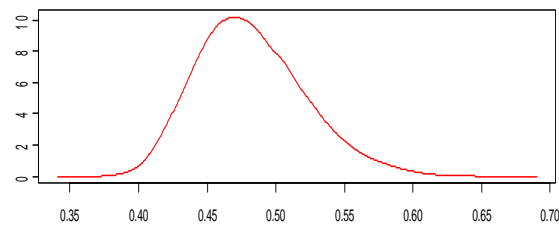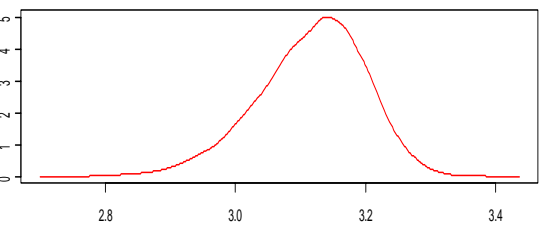 $E[\sigma_i]$ 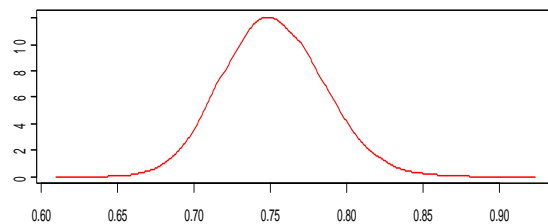

Supplement: MOESM2 [file 9432058]
